# Supplementary material
Source: publisher figshare collection journal article supplement (https://acs.figshare.com/ndownloader/files/19679483)
Supplement: Supplementary file 1 [file 19679483]

## Supporting Information

# **A Luminescent Amine-Functionalized Metal-Organic Framework Conjugated with Folic Acid as a Targeted Biocompatible pH- Responsive Nanocarrier for Apoptosis Induction in Breast Cancer Cells**

Reza Abazari,<sup>†</sup> Farangis Ataei,<sup>‡</sup> Ali Morsali,<sup>\*,†</sup> Alexandra M. Z. Slawin,<sup>§</sup> and Cameron L.

Carpenter-Warren<sup>§</sup>

<sup>†</sup>Department of Chemistry, Faculty of Basic Sciences, Tarbiat Modares University, Tehran,

14115–175, Iran

<sup>‡</sup>Department of Biochemistry, Faculty of Biological Sciences, Tarbiat Modares University,

Tehran, 14115–175, Iran

<sup>§</sup>School of Chemistry, University of St Andrews, St Andrews, Fife, KY16 9ST, UK

---

*\*E-mail: morsali\_a@modares.ac.ir*

**Collection and reduction of X-ray data.** X-ray diffraction data was collected at 125 K using a Rigaku SCXmini CCD diffractometer with a SHINE monochromator [Mo K $\alpha$  radiation ( $\lambda$  = 0.71075 Å)]. Intensity data were collected using  $\omega$  steps accumulating area detector images spanning at least a hemisphere of reciprocal space. All data were corrected for Lorentz polarization effects. A multiscan absorption correction was applied by using CrysAlisPro<sup>1</sup> Structures were solved by dual space methods (SHELXT) and refined by full-matrix least-squares against F<sup>2</sup> (SHELXL-2013).<sup>2</sup> Non-hydrogen atoms were refined anisotropically, and hydrogen atoms were refined using a riding model, with the exception of the N-H's, which were refined freely. All calculations were performed using Olex 2.<sup>3</sup> The occupancy of the second DMF molecule was set to 0.5, in order to obtain consistent thermal parameters - the formula reflects this. Selected crystallographic data are presented in Table S1.

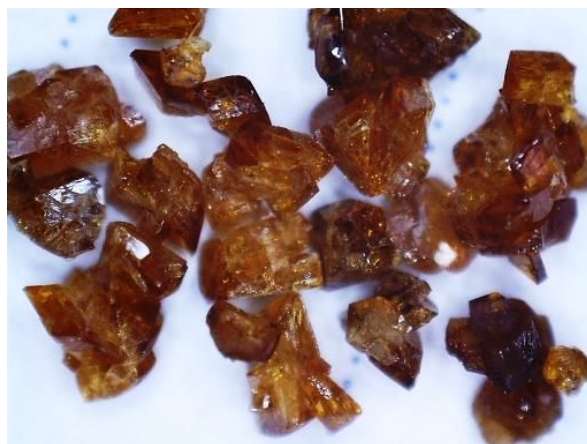

**Figure S1.** Light microscope image of bulk NH<sub>2</sub>-Eu:TMU-62 crystals.

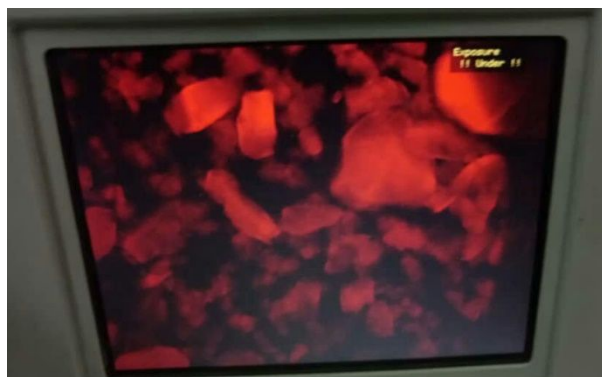

**Figure S2.** Fluorescence microscope image of bulk NH<sub>2</sub>-Eu:TMU-62 crystals.

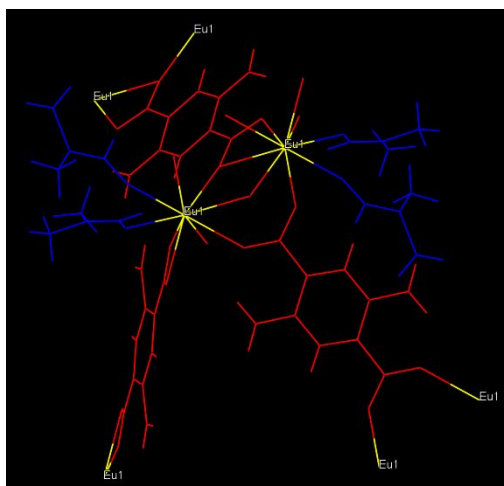

**Figure S3.** The coordination environment of the  $\text{NH}_2\text{-Eu:TMU-62}$  (2-ATA ligand: red; DMF: blue; and Eu: yellow).

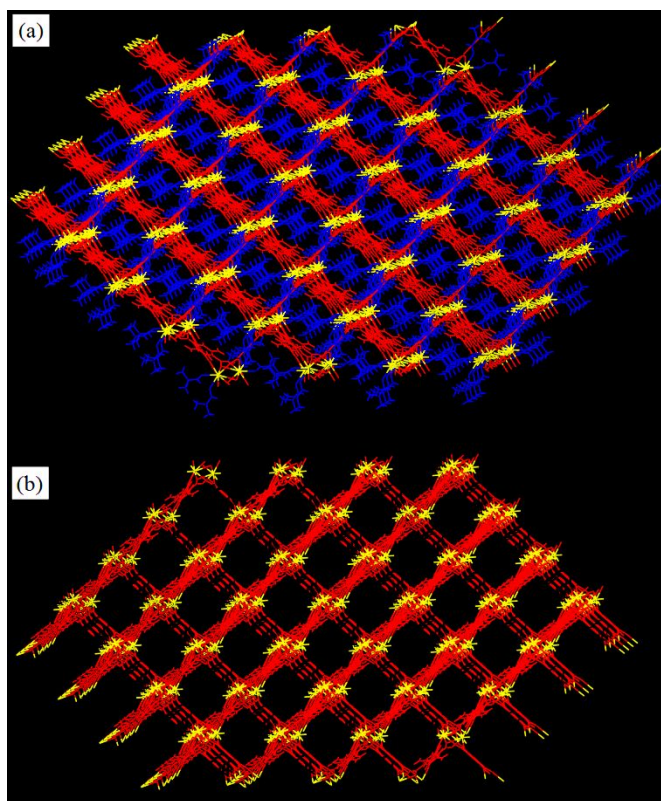

**Figure S4.** The pore geometry of the 3D structure of the NH<sub>2</sub>-Eu:TMU-62 along the *c* axis. (a) With coordinated DMF molecules and (b) activated NH<sub>2</sub>-Eu:TMU-62.

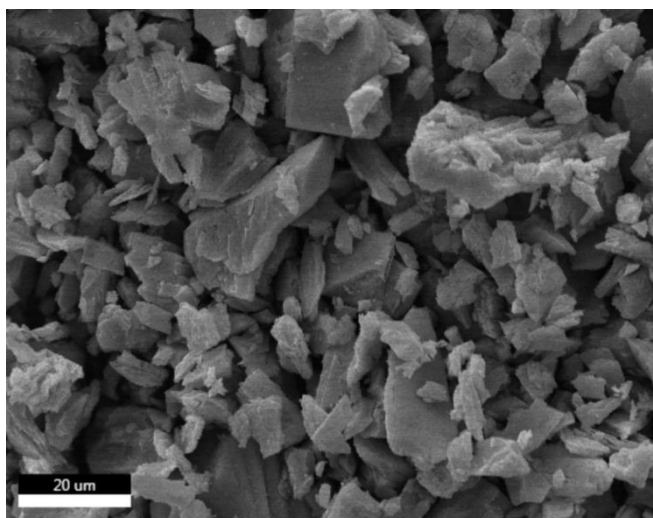

**Figure S5.** The FE-SEM image of the  $\text{NH}_2\text{-Eu:TMU-62}$  crystals.

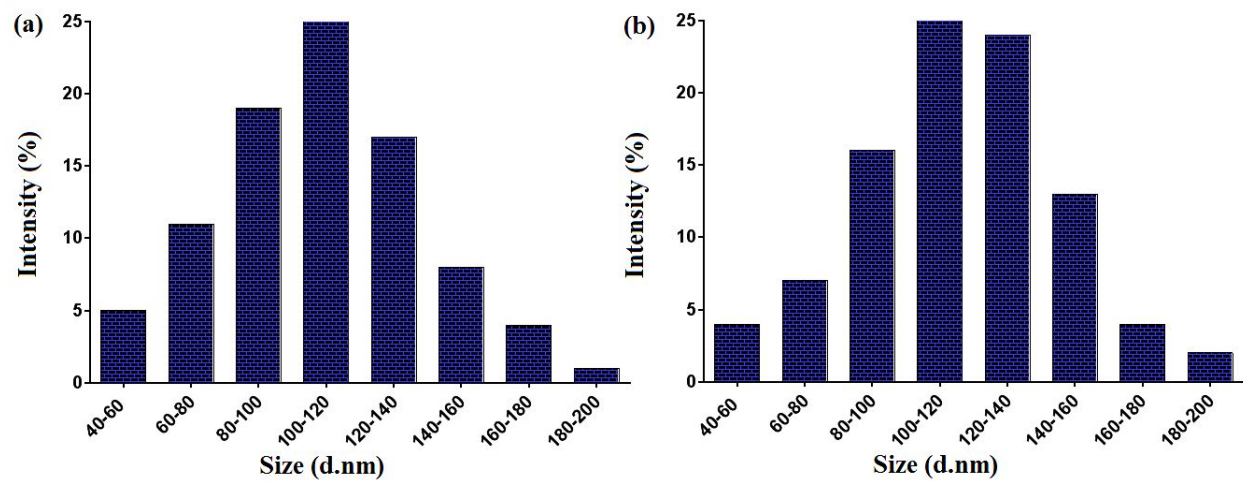

**Figure S6.** Particle size distribution of the FOLA@NH<sub>2</sub>-Eu:TMU-62 in water (a) and PBS (b).



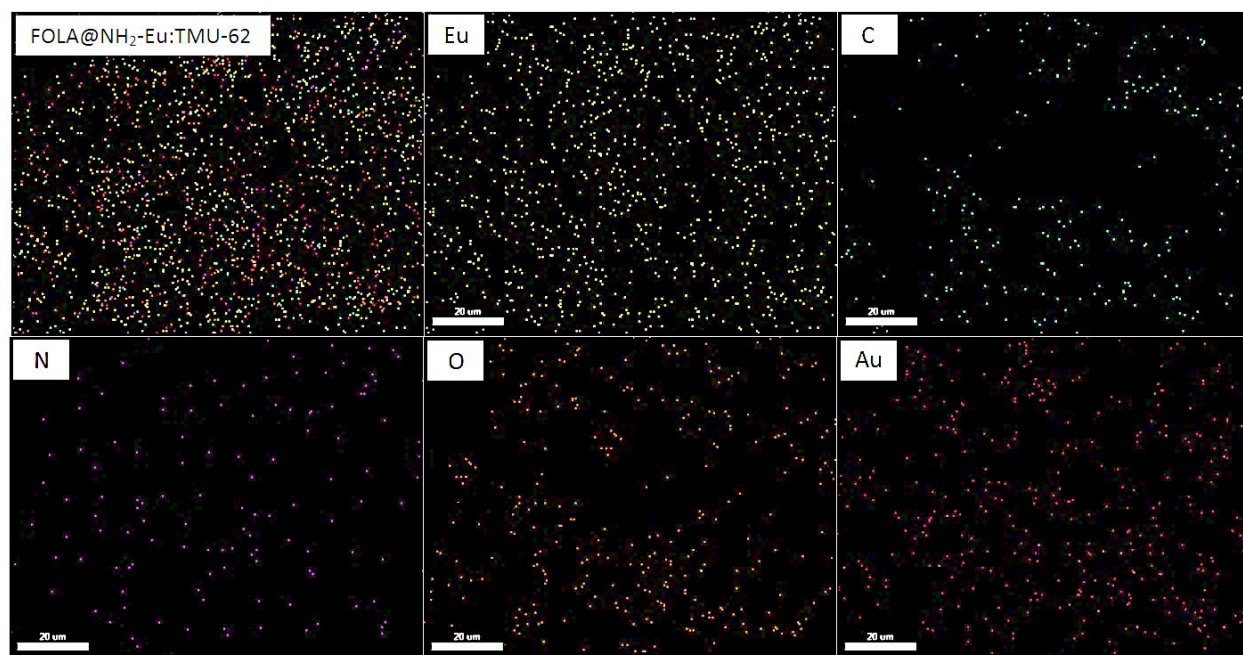

**Figure S7.** The elemental mapping of the FOLA@NH<sub>2</sub>-Eu:TMU-62.

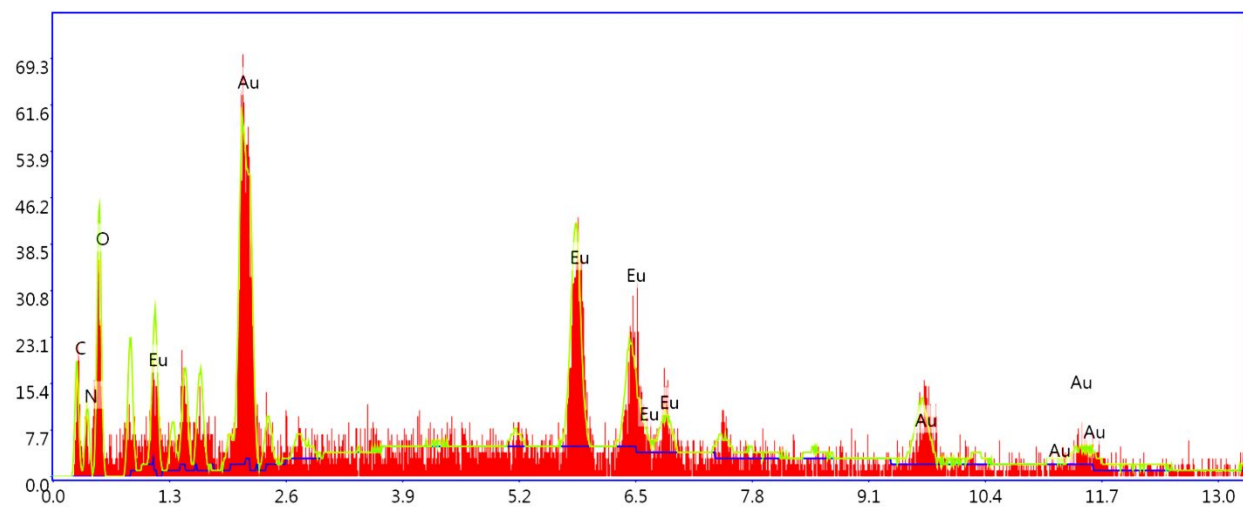

**Figure S8.** EDS analysis of the synthesized FOLA@NH<sub>2</sub>-Eu:TMU-62.

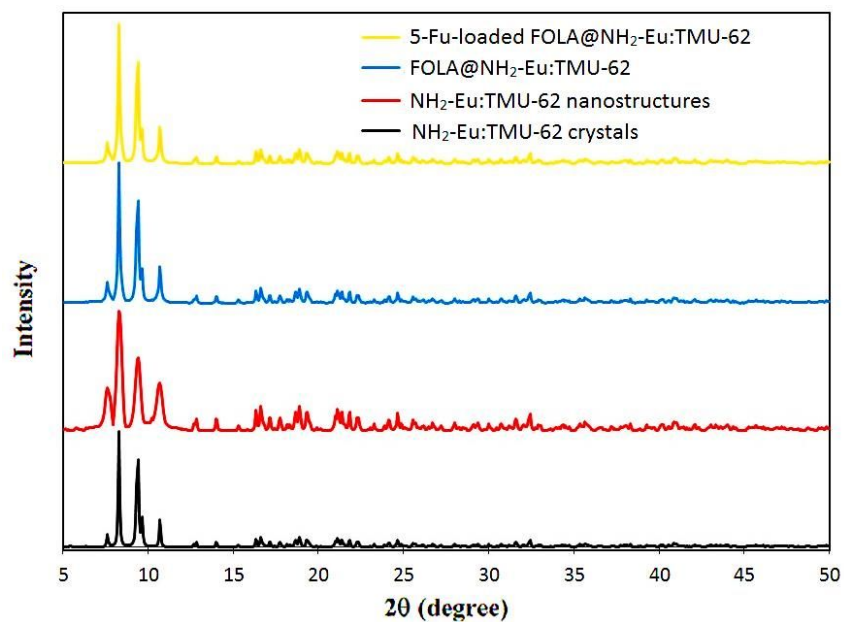

**Figure S9.** The XRD patterns of the NH<sub>2</sub>-Eu:TMU-62 structure simulated from the single crystal X-ray data (black line), the NH<sub>2</sub>-Eu:TMU-62 nanostructures synthesized via the conventional ball mill (red line), the FOLA@NH<sub>2</sub>-Eu:TMU-62 (blue line), and the loaded FOLA@NH<sub>2</sub>-Eu:TMU-62 with 5-Fu drug (orange line).

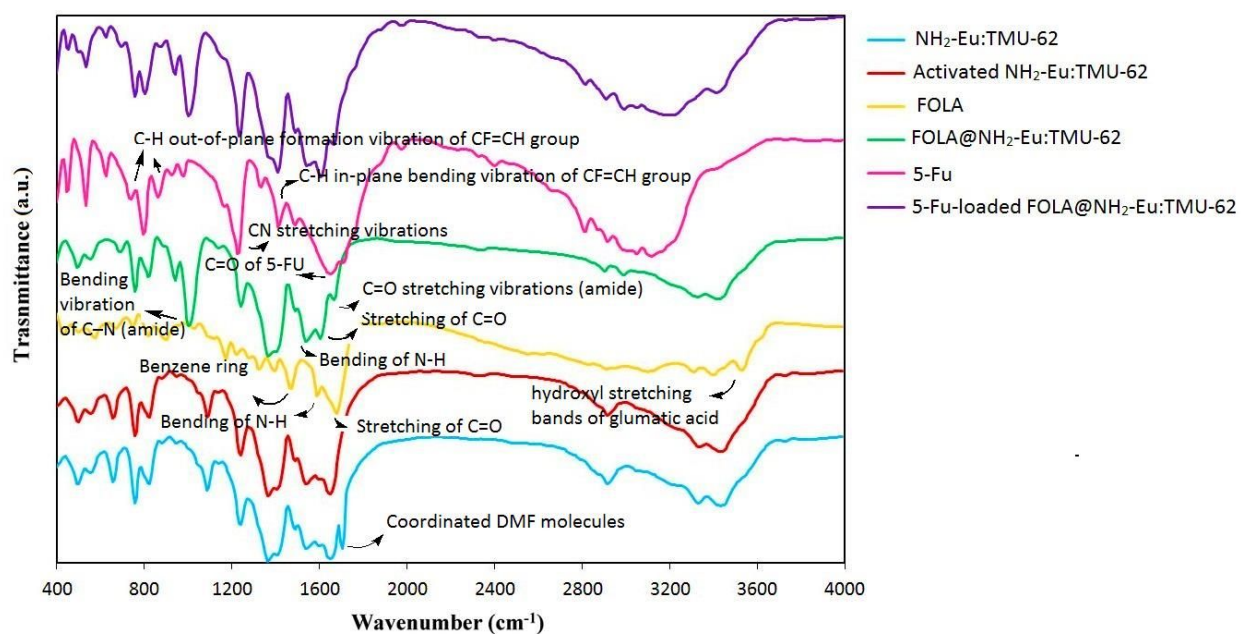

**Figure S10.** The FT-IR spectra of the NH<sub>2</sub>-Eu:TMU-62 (blue line), activated NH<sub>2</sub>-Eu:TMU-62 (red line), FOLA (orange line), FOLA@NH<sub>2</sub>-Eu:TMU-62 (green line), 5-Fu (pink line), and 5-Fu-loaded FOLA@NH<sub>2</sub>-Eu:TMU-62 (purple line).

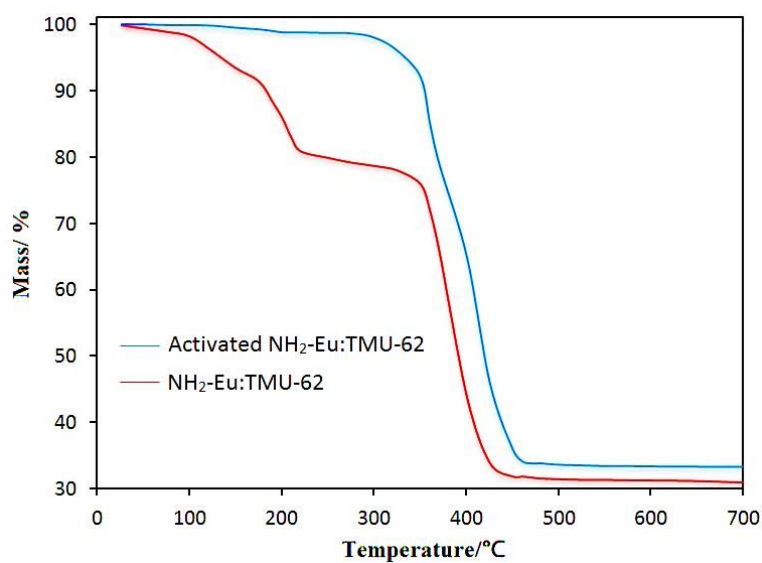

**Figure S11.** Thermogravimetric analysis of the NH<sub>2</sub>-Eu:TMU-62 single crystals synthesized via the hydrothermal method (red line) and the NH<sub>2</sub>-Eu:TMU-62 sample activated under vacuum at 140 °C for 24 h (blue line).

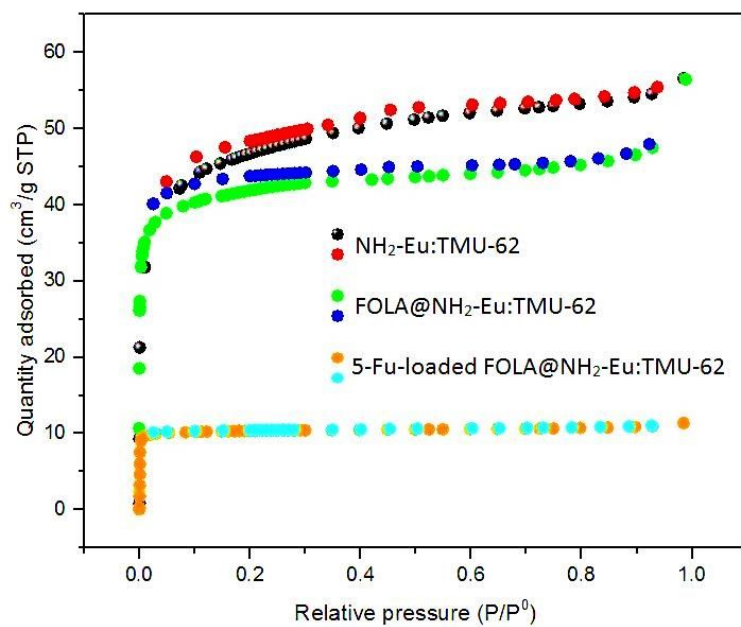

**Figure S12.** The N<sub>2</sub> adsorption-desorption isotherms of NH<sub>2</sub>-Eu:TMU-62, FOLA@NH<sub>2</sub>-Eu:TMU-62, and 5-Fu-loaded FOLA@NH<sub>2</sub>-Eu:TMU-62 collected at 77 K.

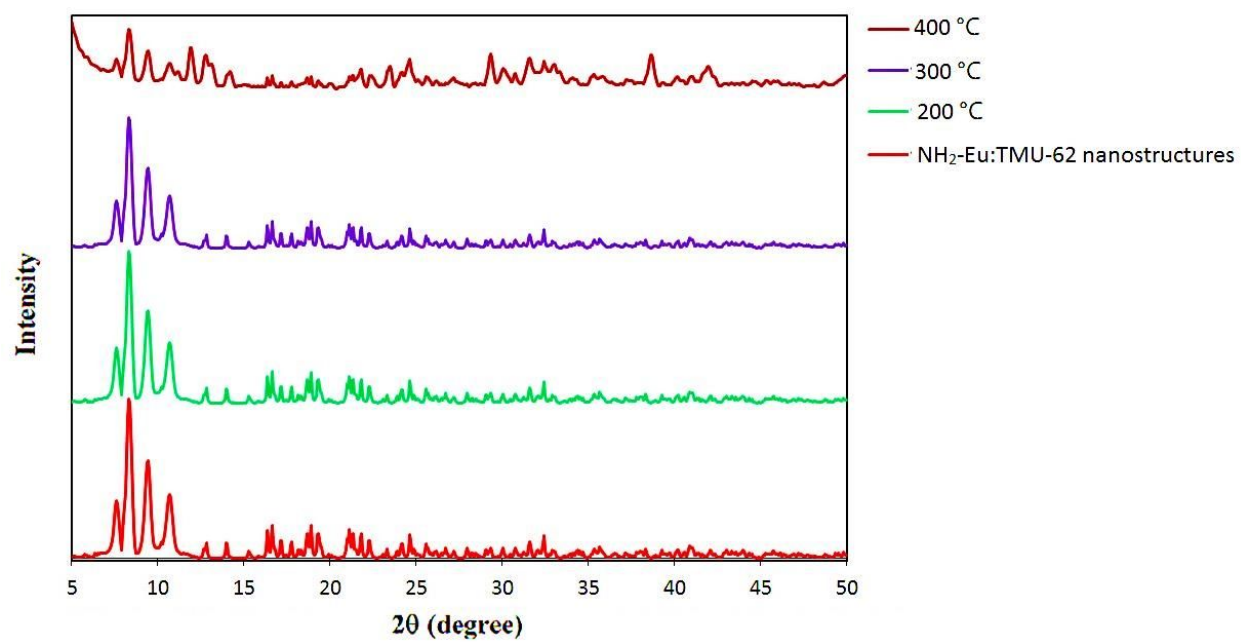

**Figure S13.** The PXRD patterns of the NH<sub>2</sub>-Eu:TMU-62 nanostructures (red line); and the NH<sub>2</sub>-Eu:TMU-62 nanostructures calcined in air at 200 °C (green line), 300 °C (purple line), and 400 °C (brown line).

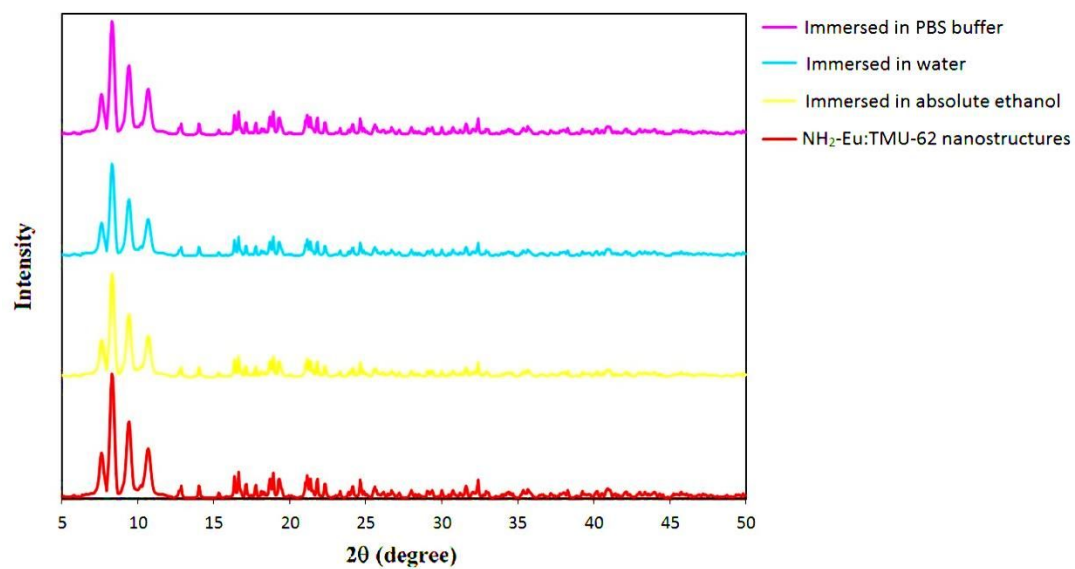

**Figure S14.** The PXRD patterns of the NH<sub>2</sub>-Eu:TMU-62 nanostructures (red line); and the NH<sub>2</sub>-Eu:TMU-62 nanostructures immersed in absolute ethanol (yellow line), water (blue line), and PBS buffer (pink line).



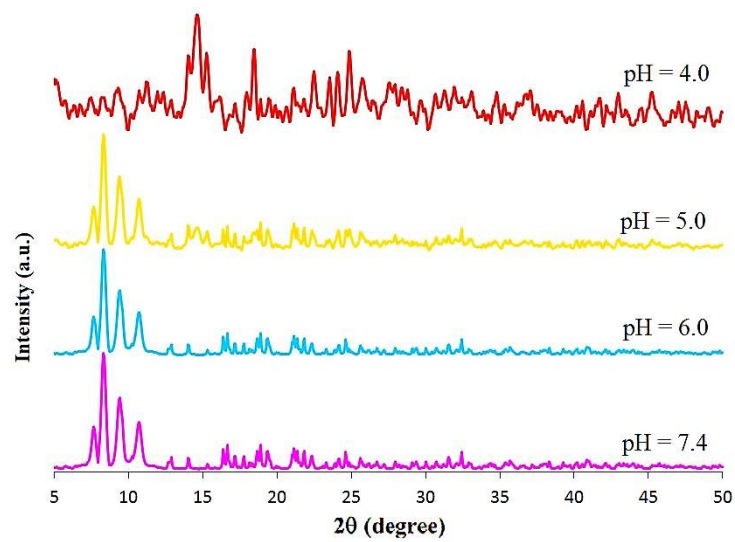

**Figure S15.** The PXRD patterns of FOLA@NH<sub>2</sub>-Eu:TMU-62 carrier in the PBS solution at different pHs.

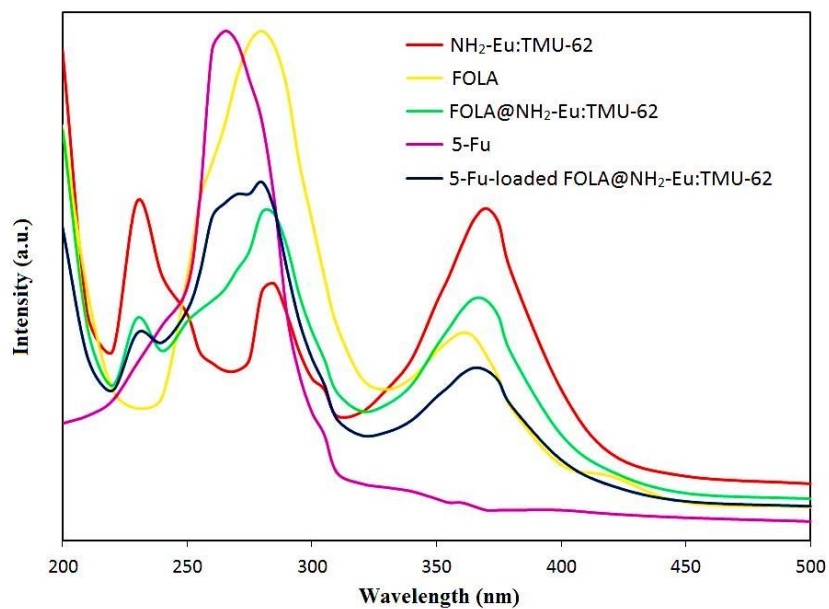

**Figure S16.** UV–visible absorption spectra of the NH<sub>2</sub>-Eu:TMU-62 (red line), FOLA (orange line), FOLA@NH<sub>2</sub>-Eu:TMU-62 (green line), 5-Fu (pink line), and 5-Fu-loaded FOLA@NH<sub>2</sub>-Eu:TMU-62 (dark blue).

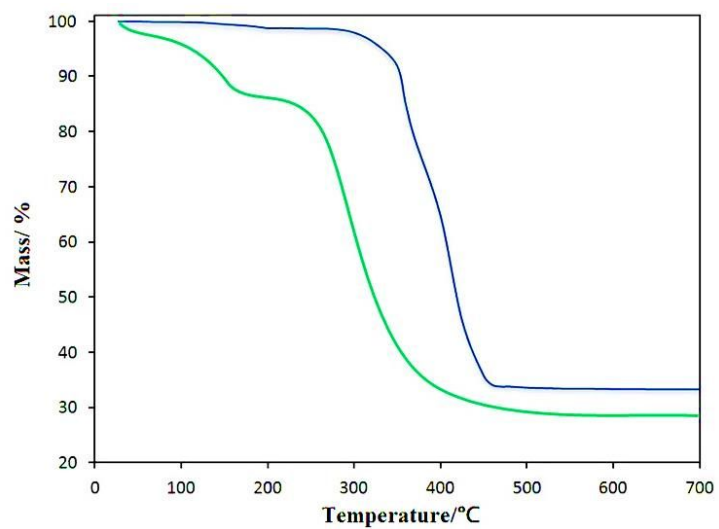

**Figure S17.** Thermogravimetric analysis of the NH<sub>2</sub>-Eu:TMU-62 (blue line) and FOLA@NH<sub>2</sub>-Eu:TMU-62 (green line).

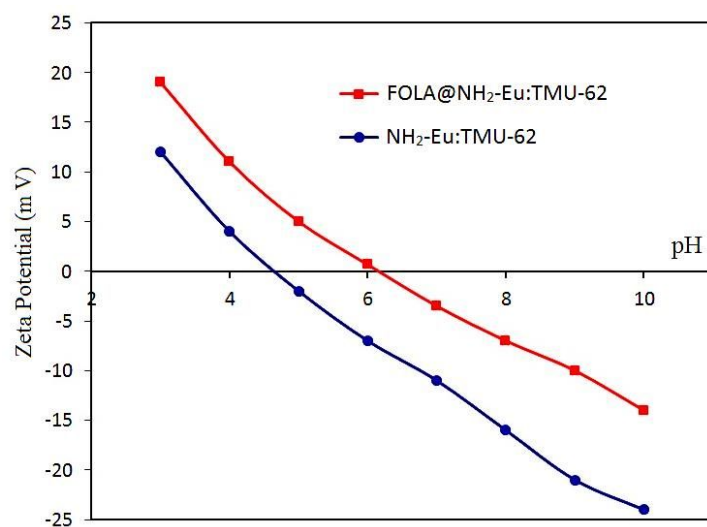

**Figure S18.** Variation of zeta-potential of NH<sub>2</sub>-Eu:TMU-62 (blue line) and FOLA@NH<sub>2</sub>-Eu:TMU-62 (red line) as a function of pH.

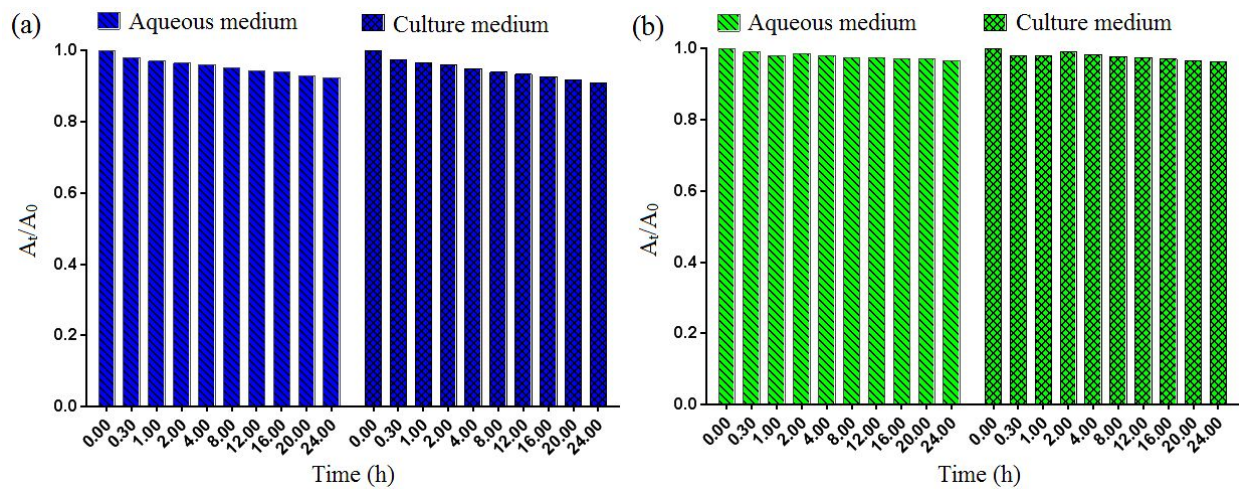

**Figure S19.** Normalized UV absorbance ( $A_t/A_0$ ) vs. time plots of (a) the  $\text{NH}_2\text{-Eu:TMU-62}$  and (b)  $\text{FOLA@NH}_2\text{-Eu:TMU-62}$  in aqueous and culture medium in different mediums ( $A_t$  = absorbance at time 't' and  $A_0$  = Absorbance at t=0).

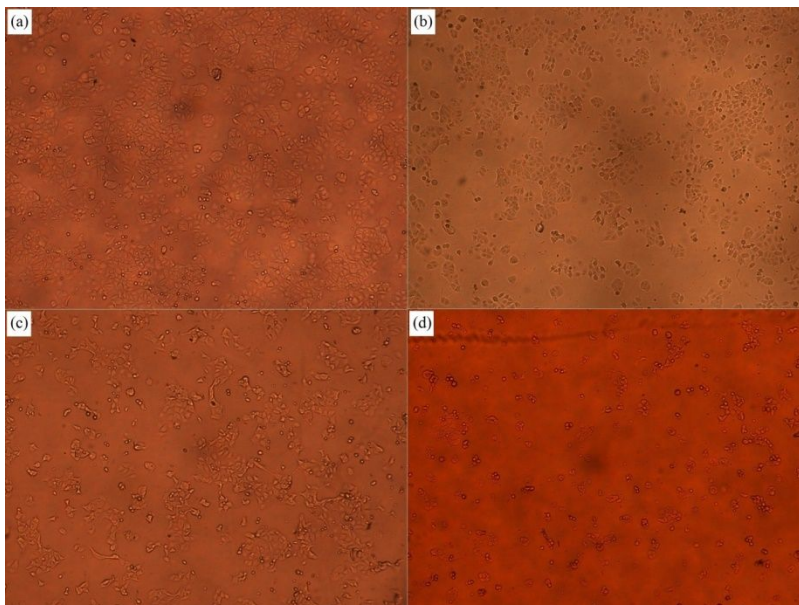

**Figure S20.** The morphological changes in the MCF-7 cells of the control group (a) and the cells exposed to the FOLA@NH<sub>2</sub>-Eu:TMU-62 carrier (b), alone 5-Fu (c), and 5-Fu-loaded FOLA@NH<sub>2</sub>-Eu:TMU-62 (d) at pH 7.4 for 24 h. Cell density reduction, irregular shapes and cellular shrinkage were observed by optical microscopy.

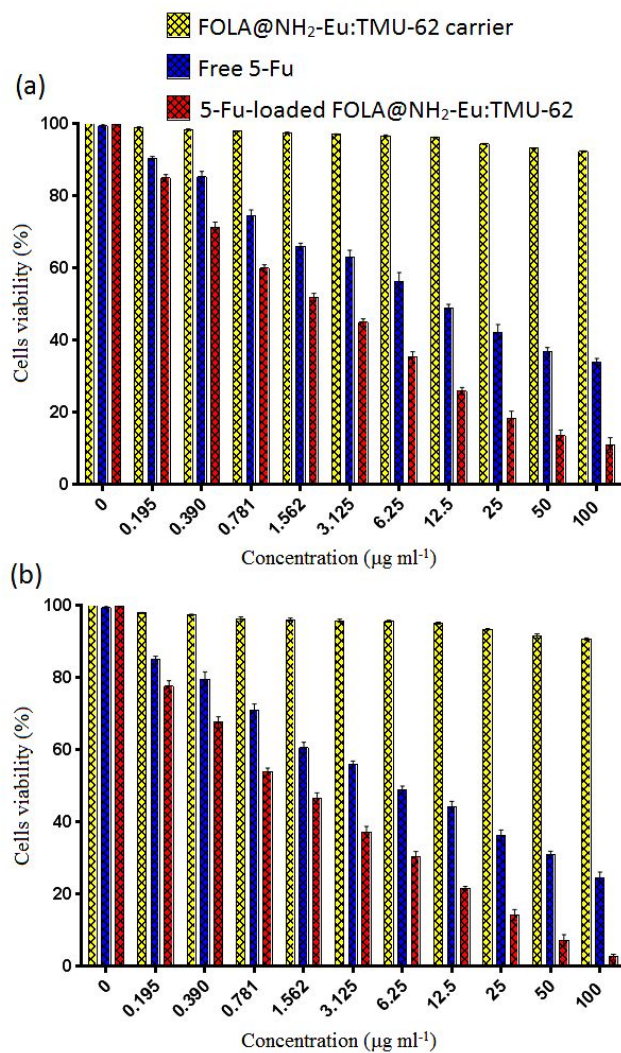

**Figure S21.** Comparison of the cytotoxic effect of the FOLA@NH<sub>2</sub>-Eu:TMU-62 carrier, alone 5-Fu, and 5-Fu-loaded FOLA@NH<sub>2</sub>-Eu:TMU-62 on cell viability of the MCF-7 cells incubated at pH 7.4 in the presence of various concentrations of the samples for 24h (a) and 72h (b).

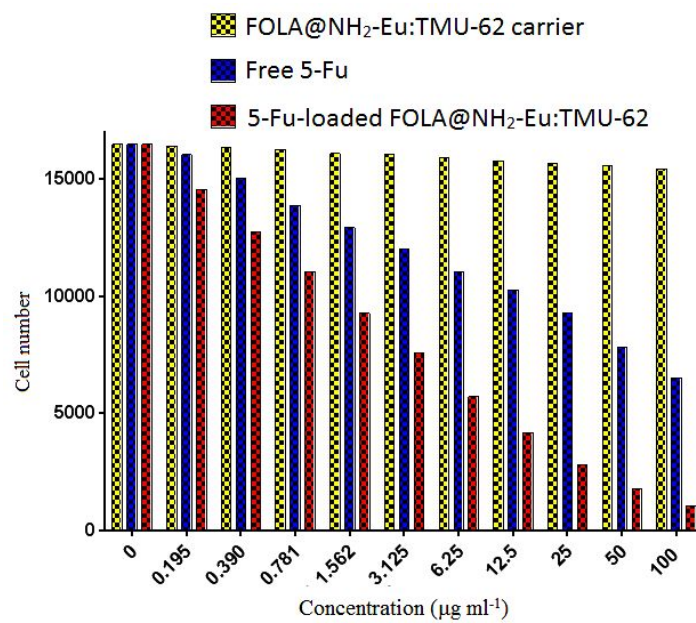

**Figure S22.** *In vitro* viability of the MCF-7 cells dyed with trypan blue and incubated at pH 7.4 for 24 h with various concentrations of the FOLA@NH<sub>2</sub>-Eu:TMU-62 carrier, alone 5-Fu, and 5-Fu-loaded FOLA@NH<sub>2</sub>-Eu:TMU-62.



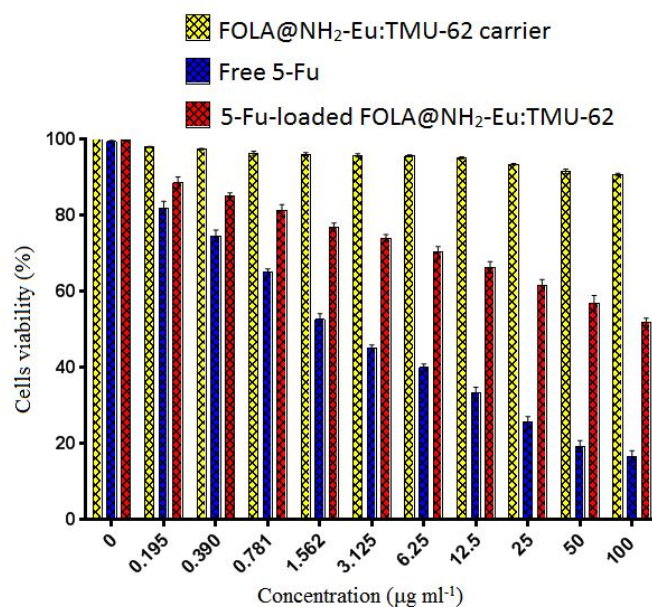

**Figure S23.** Comparison of the cytotoxic effect of the FOLA@NH<sub>2</sub>-Eu:TMU-62 carrier, alone 5-Fu, and 5-Fu-loaded FOLA@NH<sub>2</sub>-Eu:TMU-62 on cell viability of the MCF-10A cells incubated at pH 7.4 for 24h in the presence of various concentrations of the samples.

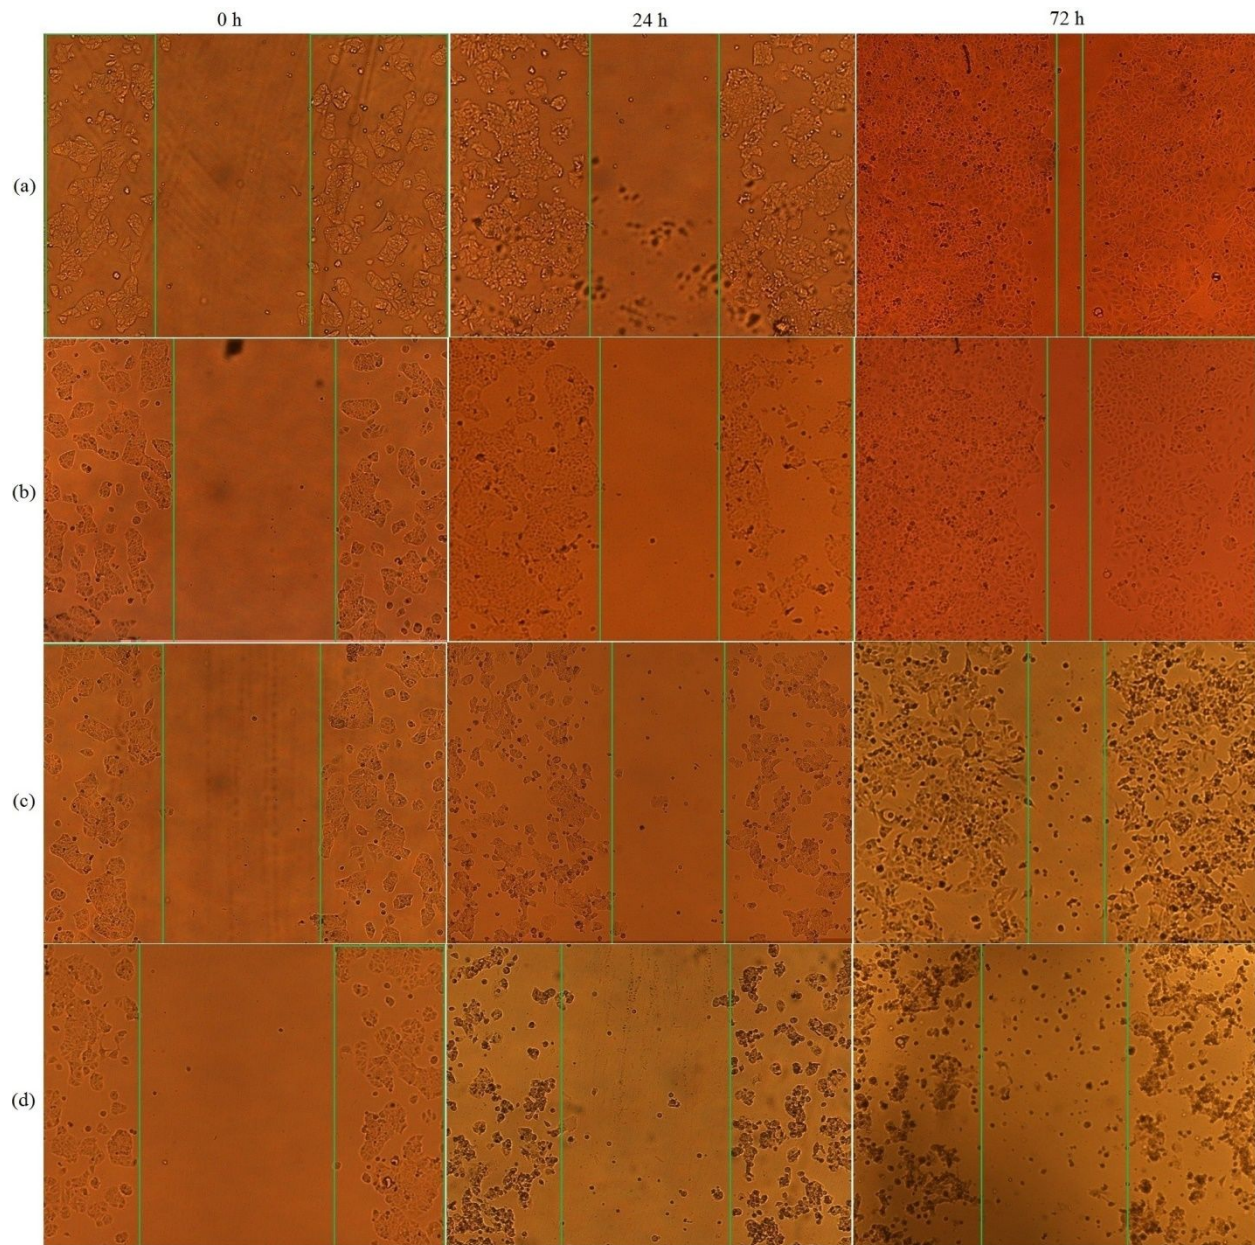

**Figure S24.** Optical microscopic images in migratory abilities of MCF-7 cells in wound healing assay at 0, 24 and 72h after the creation of wounds. (a) Control group, (b) FOLA@NH<sub>2</sub>-Eu:TMU-62, (c) alone 5-Fu and (d) 5-Fu-loaded FOLA@NH<sub>2</sub>-Eu:TMU-62.

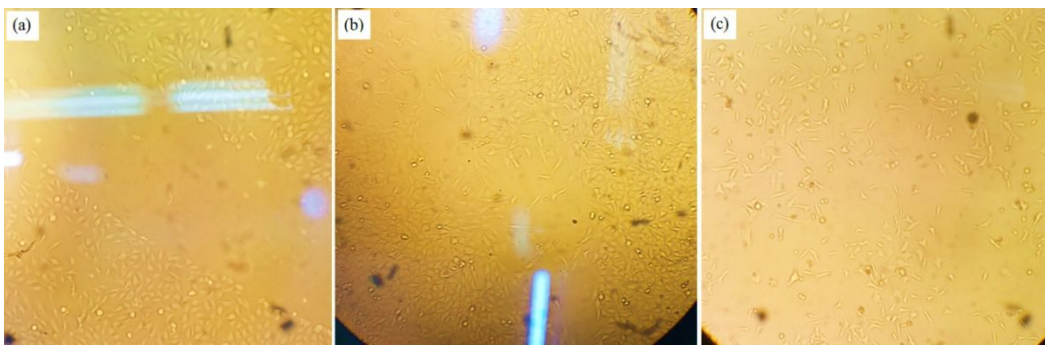

**Figure S25.** Optical microscopic images in migratory abilities of MCF-10A cells in wound healing assay at 72h after the creation of wounds. (a) Control group, (b) 5-Fu-loaded FOLA@NH<sub>2</sub>-Eu:TMU-62 after 24 h, and (c) 5-Fu-loaded FOLA@NH<sub>2</sub>-Eu:TMU-62 after 72 h.

**Table S1.** Quantitative apoptosis assay on the MCF-7 cell line using the Annexin-V/PI dual staining method in the framework of the flow cytometry method. The percentage of the viable, early apoptotic, late apoptotic and necrotic cells are presented as mean values ( $n = 3$ ).

| Treatment Group                             | Conc. ( $\mu\text{g ml}^{-1}$ ) | Viable cells<br>(Q4%) | Early apoptotic<br>cell (Q3%) | Late apoptotic<br>cells (Q2%) | Necrotic<br>cells (Q1%) | Cell<br>death | Apoptotic cells<br>(Q2% + Q3%) |
|---------------------------------------------|---------------------------------|-----------------------|-------------------------------|-------------------------------|-------------------------|---------------|--------------------------------|
| Control group                               | 1.562                           | 88.20                 | 1.37                          | 7.07                          | 3.35                    | 11.80         | 8.44                           |
| FOLA@NH <sub>2</sub> -Eu:TMU-62             | 1.562                           | 76.50                 | 0.65                          | 15.20                         | 7.65                    | 23.50         | 15.85                          |
| Free 5-Fu                                   | 1.562                           | 59.10                 | 1.63                          | 22.50                         | 16.77                   | 40.90         | 24.13                          |
| 5-Fu-loaded FOLA@NH <sub>2</sub> -Eu:TMU-62 | 1.562                           | 38.50                 | 35.9                          | 25.50                         | 0.011                   | 61.50         | 61.4                           |

**Table S2.** Crystal data and structure refinement for TMU-62.

|                                                |                                                                               |
|------------------------------------------------|-------------------------------------------------------------------------------|
| Identification code                            | TMU-62                                                                        |
| Empirical formula                              | $\text{Eu}_{0.33} \text{N}_{1.17} \text{O}_{2.75} \text{C}_6 \text{H}_{6.83}$ |
| Formula weight                                 | 189.48                                                                        |
| Temperature/K                                  | 173                                                                           |
| Crystal system                                 | triclinic                                                                     |
| Space group                                    | P-1                                                                           |
| a/Å                                            | 10.5035(7)                                                                    |
| b/Å                                            | 11.2286(8)                                                                    |
| c/Å                                            | 12.8073(12)                                                                   |
| $\alpha/^\circ$                                | 100.493(8)                                                                    |
| $\beta/^\circ$                                 | 110.554(6)                                                                    |
| $\gamma/^\circ$                                | 100.335(6)                                                                    |
| Volume/Å <sup>3</sup>                          | 1341.2(2)                                                                     |
| Z                                              | 6                                                                             |
| $\rho_{\text{calc}}/\text{cm}^3$               | 1.407                                                                         |
| $\mu/\text{mm}^{-1}$                           | 0.517                                                                         |
| F(000)                                         | 562.86                                                                        |
| Crystal size/mm <sup>3</sup>                   | 0.220                                                                         |
| Radiation                                      | Mo K $\alpha$ ( $\lambda$ = 0.71075)                                          |
| 2 $\theta$ range for data collection/ $^\circ$ | 3.52 to 50.48                                                                 |
| Index ranges                                   | -12 $\leq$ h $\leq$ 12, -13 $\leq$ k $\leq$ 13, -15 $\leq$ l $\leq$ 15        |
| Reflections collected                          | 11818                                                                         |
| Independent reflections                        | 11818 [ $R_{\text{int}}$ = 0.0722, $R_{\text{sigma}}$ = 0.1427]               |
| Data/restraints/parameters                     | 11818/258/307                                                                 |
| Goodness-of-fit on F <sup>2</sup>              | 1.136                                                                         |
| Final R indexes [ $I \geq 2\sigma(I)$ ]        | $R_1$ = 0.0486, $wR_2$ = 0.1466                                               |
| Final R indexes [all data]                     | $R_1$ = 0.0442, $wR_2$ = 0.1439                                               |
| Largest diff. peak/hole / e Å <sup>-3</sup>    | 1.712/-1.013                                                                  |

## References

- (1) *CrysAlisPro* v1.171.38.41. Rigaku Oxford Diffraction, Rigaku Corporation, Oxford, U.K. **2015**.
- (2) Sheldrick, G. M. *Acta Crystallogr., Sect. A*. **2015**, 71, 3.
- (3) Dolomanov, O.V.; Bourhis, L.J.; Gildea, R.J.; Howard, J.A.K.; Puschmann, H. *J. Appl. Cryst.* **2009**, 42, 339.
